# Supplementary material
Source: PubMed Central journal article supplement (PMC5487619)
Supplement: AAC.02465-16_zac006176256s1.pdf [file AAC.02465-16_zac006176256s1.pdf]

## Supplemental Material

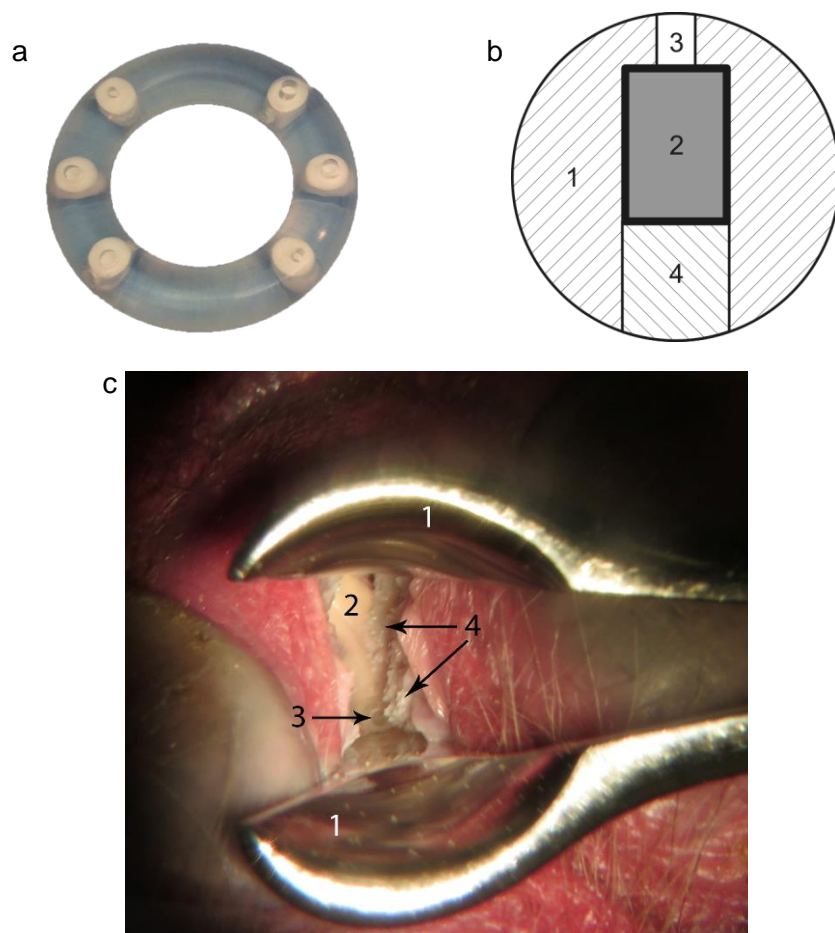

**Figure S1.** (a) Photograph of a macaque-sized pod-IVR with six pods. (b) Cartoon showing cross-sectional view through a single pod. The solid VRC01-N formulation core, 2, coated with a PLA polymer (rate controlling membrane, thick black line) is embedded in the preformed silicone ring scaffold, 1. A silicone adhesive backfill, 4, seals the pod in the ring scaffold. A delivery channel, 3, exposes a portion of the pod to vaginal fluids and provides the primary control of release rate of VRC01-N from the pod-IVR. (c) Photograph of VRC01-N pod-IVR in place in macaque vaginal vault showing: pediatric speculum, 1; pod-IVR, 2; pod delivery channel in IVR, 3; and vaginal rugae, 4.

**Table S1.** Configuration and *in vitro* release of pod-IVRs used in PK1 and PK2 non-human primate studies.

| Study Group | Total VRC01-N Load (mg) | Delivery Channel Diameter (mm) | Pods per IVR | <i>In vitro</i> release rate (mg day <sup>-1</sup> ) | <i>In vivo</i> release rate estimate <sup>1</sup> (mg day <sup>-1</sup> ) |
|-------------|-------------------------|--------------------------------|--------------|------------------------------------------------------|---------------------------------------------------------------------------|
| PK1-low     | 15                      | 1.0                            | 2            | 3.8                                                  | 1.2                                                                       |
| PK1-med     | 45                      | 1.0                            | 6            | 12                                                   | 3.5                                                                       |
| PK1-high    | 73                      | 1.5                            | 6            | 30                                                   | 10                                                                        |
| PK2         | 42                      | 1.0                            | 4            | 3.4                                                  | 2.3                                                                       |

<sup>1</sup> *In vivo* release rate estimated from model fits as described in the text.

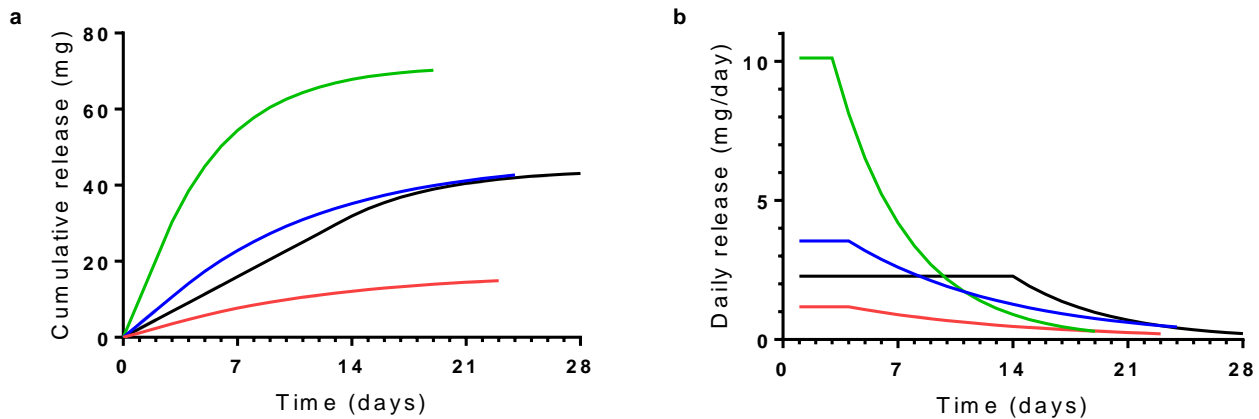

**Figure S2.** Estimated cumulative (a) and daily (b) *in vivo* release profiles determined using pod-IVR diffusion model and observed VRC01-N levels in vaginal fluids for PK1-high (green), PK1-med (blue), PK1-low (red) and PK2 (black) macaque studies.

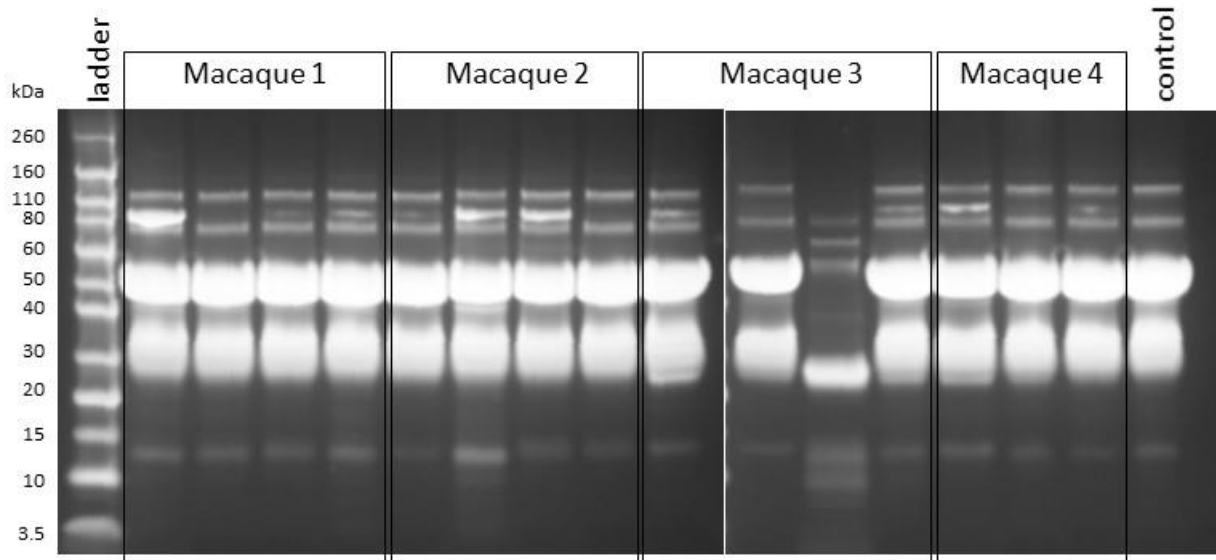

**Figure S3.** Analysis of residual VRC01-N extracted from IVRs by SDS-PAGE after removal at Day 7 (Phase A) of PK2. Individual pods from each of the four IVRs were analyzed in separate lanes (only three pods for Macaque 4 were analyzed), along with a control pod obtained from an unused IVR from the same fabrication batch.

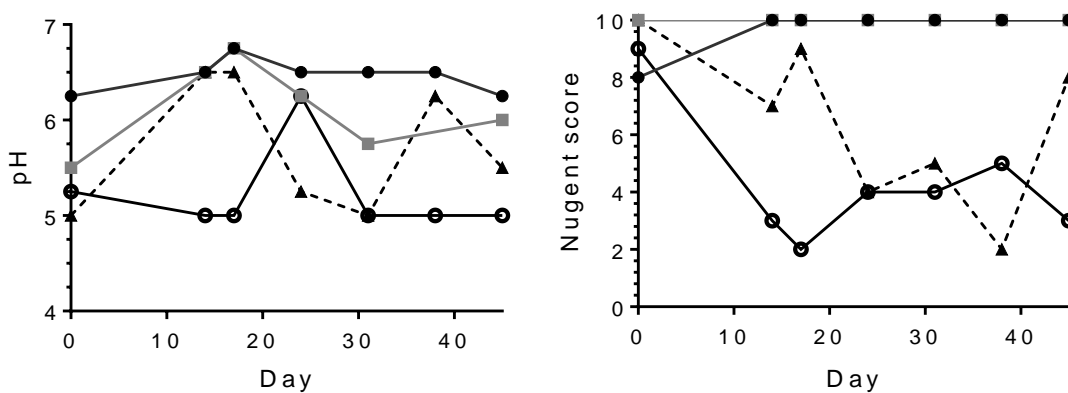

**Figure S4.** Time series plots of pH and Nugent score for each macaque in PK2.
